# Supplementary material for: Extracellular S100A9 Protein in Bone Marrow Supports Multiple Myeloma Survival by Stimulating Angiogenesis and Cytokine Secretion
Source: Oxford University Press journal article supplement (doi:10.1158/2326-6066.cir-17-0192), 2017-09-13
Supplement: 23266066cir170192-sup-181885_2_supp_4227487_8v36k5.docx [file 23266066cir170192-sup-181885_2_supp_4227487_8v36k5.docx]

| Gene | Primer (forward) 5′-3′ | Primer (reverse) 5′-3′ |
| --- | --- | --- |
| IL-6 | GAGGATACCACTCCCAACAGACC | GCCCTCGCTTCCGTACTCG |
| IL-10 | ACTCAATACACACTGCAGGTG | GGACTTTAAGGGTTACTTGG |
| VEGF | CACTTCCAGAAACACGACAAAC | TGGAACCGGCATCTTTATCTC |
| TNF-α | CCTTCACAGAGCAATGACTC | GTCTACTCCCAGGTTCTCTTC |

Supplementary Table 1: Primer sequences of genes evaluated by qRT-PCR.

Abbreviations: IL-6: interleukin 6; IL-10: interleukin 10; VEGF: vascular endothelial growth factor; TNF-α: tumor necrosis factor alpha
